# Supplementary material for: Aerobiological Monitoring and Metabarcoding of Grass Pollen
Source: MDPI journal article supplement (doi:10.3390/plants12122351), 2023-06-17
Supplement: s1 [file s1]

## Supplementary Materials

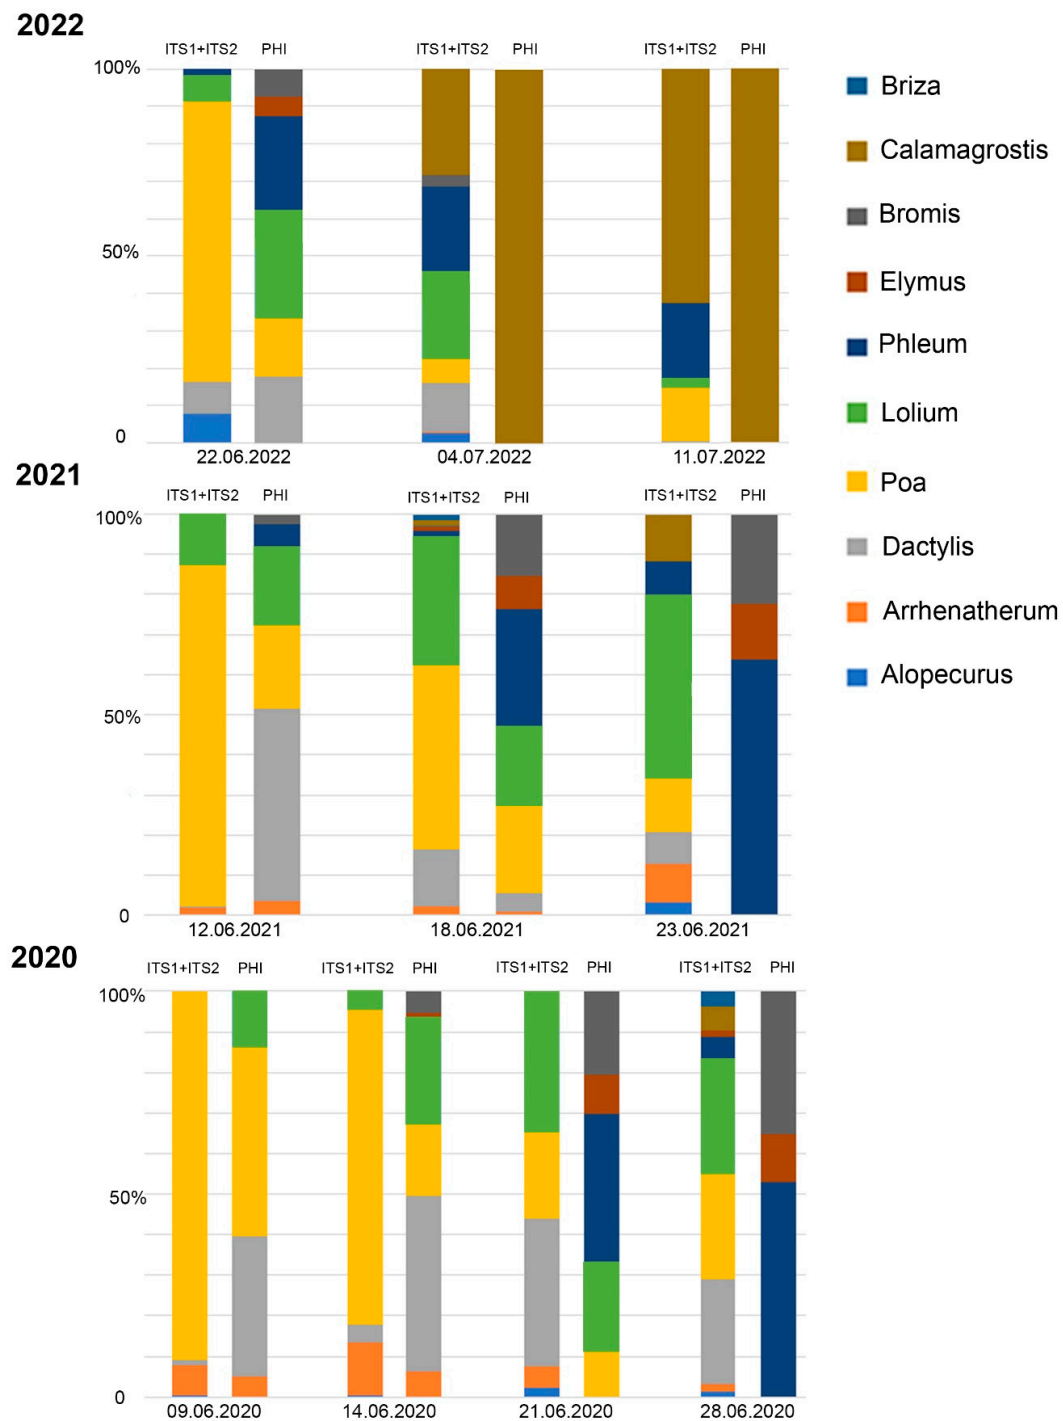

**Figure S1.** Comparison of metabarcoding results and phenological observations, Moscow 2020-2022. PHI – phenological index

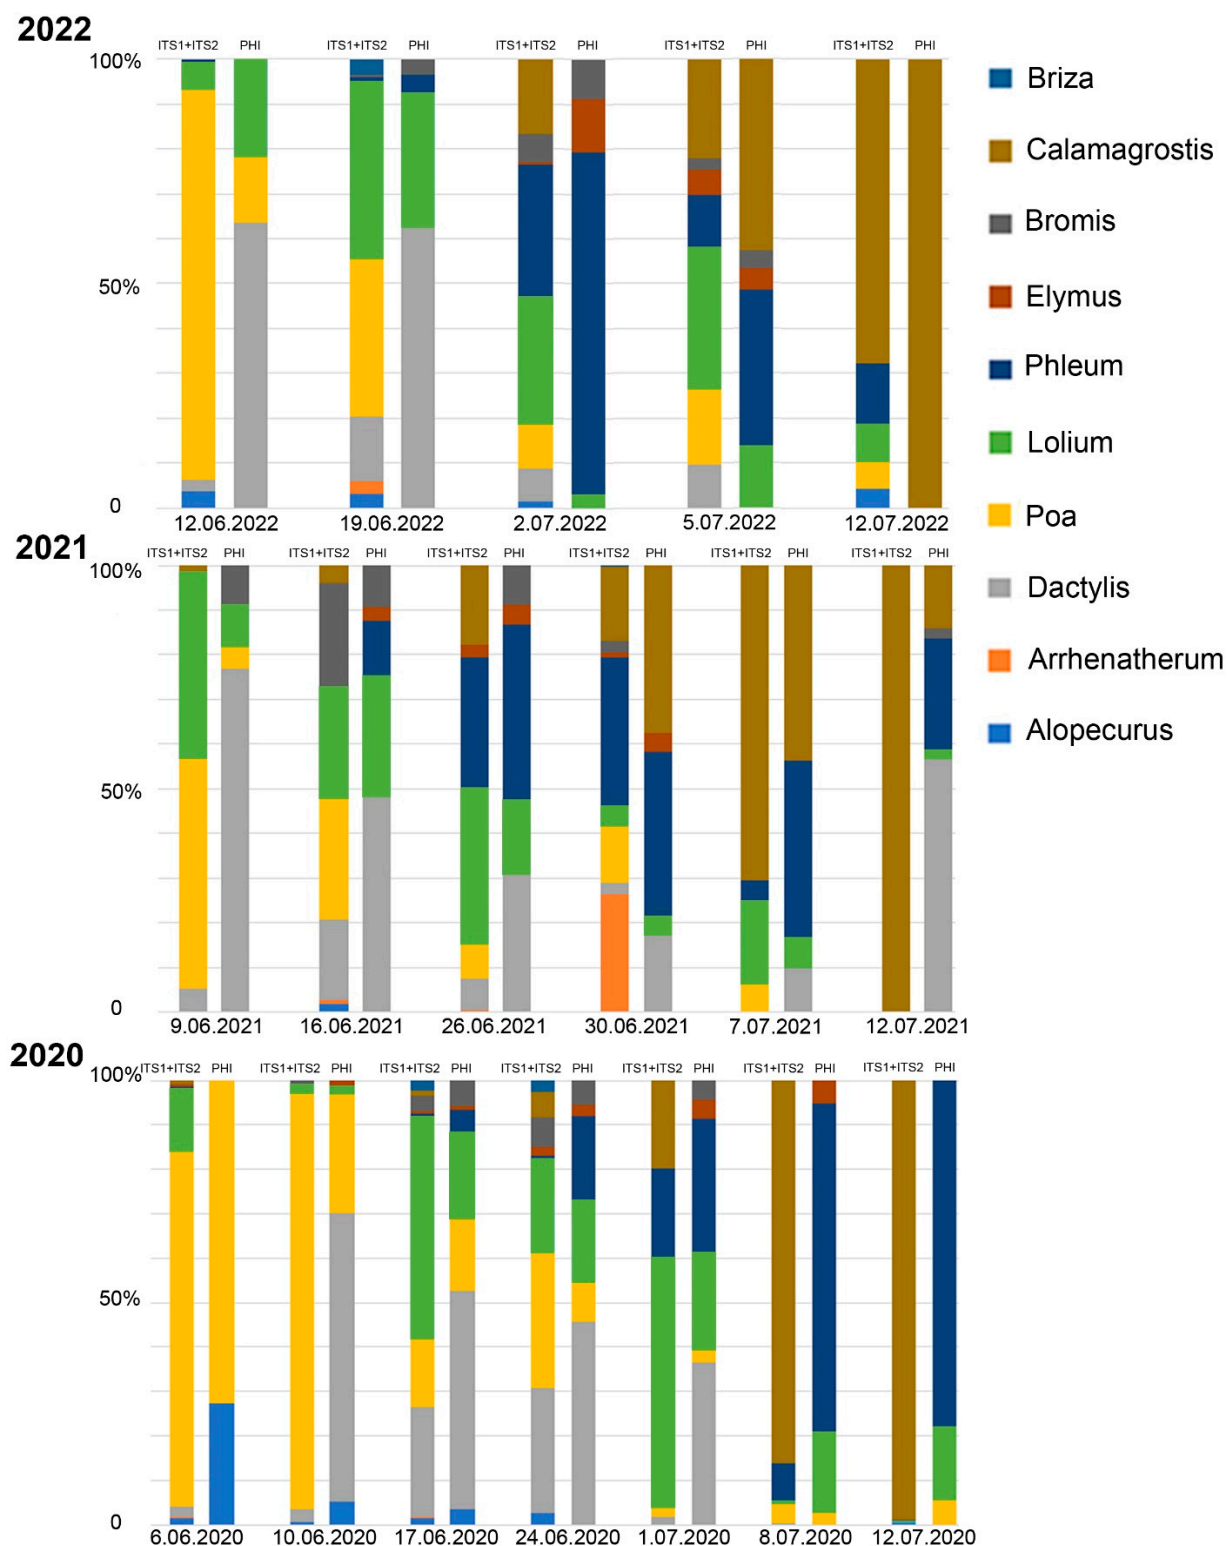

**Figure S2.** Comparison of metabarcoding results and phenological observations, Ryazan, 2020-2022. PHI – phenological index

**Table S1.** List of samples.

| Moscow         |              |                | Rvazan         |                 |               |
|----------------|--------------|----------------|----------------|-----------------|---------------|
| 2020           | 2021         | 2022           | 2020           | 2021            | 2022          |
| p1 09-10.06    | p23 12-13.06 | p35 21-22.06   | p48 06-07.06   | p85 07-08.06    | p113 12-13.06 |
| p2 10-11.06    | p24 13-14.06 | p36 22-23.06   | p49 07-08.06   | p86 08-09.06    | p114 13-14.06 |
| p3 11-12.06    | p25 14-15.06 | p37 23-24.06   | p50 08-09.06   | p87 09-10.06    | p115 14-15.06 |
| p4 12-13.06    | p26 15-16.06 | p38 24-25.06   | p51 09-10.06   | p88 10-11.06    | p116 15-16.06 |
| p5 13-14.06    | p27 16-17.06 | p39 28-29.06   | p52 10-11.06   | p89 11-12.06    | p117 16-17.06 |
| p6 14-15.06    | p28 17-18.06 | p40 29-30.06   | p53 11-12.06   | p90 12-13.06    | p118 17-18.06 |
| p7 15-16.06    | p29 18-19.06 | p41 30.06-1.07 | p54 12-13.06   | p91 13-14.06    | p119 18-19.06 |
| p8 16-17.06    | p30 19-20.06 | p42 01-02.07   | p55 13-14.06   | p92 14-15.06    | p120 19-20.06 |
| p9 17-18.06    | p31 20-21.06 | p43 02-03.07   | p56 14-15.06   | p93 15-16.06    | p121 02-03.07 |
| p10 18-19.06   | p32 21-22.06 | p44 03-04.07   | p57 15-16.06   | p94 16-17.06    | p122 03-04.07 |
| p11 19-20.06   | p33 22-23.06 | p45 04-05.07   | p58 16-17.06   | p95 17-18.06    | p123 04-05.07 |
| p12 20-21.06   | p34 23-24.06 | p46 10-11.07   | p59 17-18.06   | p96 18-19.06    | p124 05-06.07 |
| p13 21-22.06   |              | p47 11-12.07   | p60 18-19.06   | p97 19-20.06    | p125 06-07.07 |
| p14 22-23.06   |              |                | p61 19-20.06   | p98 26-27.06    | p126 07-08.07 |
| p15 23-24.06   |              |                | p62 20-21.06   | p99 27-28.06    | p127 08-09.07 |
| p16 24-25.06   |              |                | p63 21-22.06   | p100 28-29.06   | p128 09-10.07 |
| p17 25-26.06   |              |                | p64 22-23.06   | p101 29-30.06   | p129 10-11.07 |
| p18 26-27.06   |              |                | p65 23-24.06   | p102 30.06-1.07 | p130 11-12.07 |
| p19 27-28.06   |              |                | p66 24-25.06   | p103 01-02.07   | p131 12-13.07 |
| p20 28-29.06   |              |                | p67 25-26.06   | p104 02-03.07   |               |
| p21 29-30.06   |              |                | p68 26-27.06   | p105 03-04.07   |               |
| p22 30.06-1.07 |              |                | p69 27-28.06   | p106 04-05.07   |               |
|                |              |                | p70 28-29.06   | p107 07-08.07   |               |
|                |              |                | p71 29-30.06   | p108 08-09.07   |               |
|                |              |                | p72 30.06-1.07 | p109 09-10.07   |               |
|                |              |                | p73 01-02.07   | p110 10-11.07   |               |
|                |              |                | p74 02-03.07   | p111 11-12.07   |               |

|  |  |  |              |               |  |
|--|--|--|--------------|---------------|--|
|  |  |  | p75_03-04.07 | p112_12-13.07 |  |
|  |  |  | p76_04-05.07 |               |  |
|  |  |  | p77_05-06.07 |               |  |
|  |  |  | p78_06-07.07 |               |  |
|  |  |  | p79_07-08.07 |               |  |
|  |  |  | p80_08-09.07 |               |  |
|  |  |  | p81_09-10.07 |               |  |
|  |  |  | p82_10-11.07 |               |  |
|  |  |  | p83_11-12.07 |               |  |
|  |  |  | p84_12-03.07 |               |  |

**Table S2.** List of species observed on sample plots. All species names are according to <https://powo.science.kew.org/> Dominated species are in **bold**.

|                                                               | Moscow           |          |          |          |          |          |          |          |          | Ryazan'          |          |          |   |   |
|---------------------------------------------------------------|------------------|----------|----------|----------|----------|----------|----------|----------|----------|------------------|----------|----------|---|---|
|                                                               | № of sample plot |          |          |          |          |          |          |          |          | № of sample plot |          |          |   |   |
| Species                                                       | 1                | 2        | 3        | 4        | 5        | 6        | 7        | 8        | 9        | 1                | 2        | 3        | 4 | 5 |
| <i>Alopecurus pratensis</i> L.                                | x                |          |          |          |          |          |          |          |          | x                |          |          |   |   |
| <i>Arrhenatherum elatius</i> (L.) P. Beauv. ex J. & C. Presl. | x                |          |          | <b>x</b> |          | <b>x</b> |          |          |          |                  |          |          |   |   |
| <i>Briza media</i> L.                                         | x                |          |          |          |          |          |          |          |          |                  |          |          |   |   |
| <i>Bromus inermis</i> Leyss.                                  | <b>x</b>         |          | x        |          |          |          |          |          |          | <b>x</b>         |          |          | x | x |
| <i>Calamagrostis epigejos</i> (L.) Roth                       | x                | x        | <b>x</b> |          |          |          | x        |          |          |                  |          |          | x | x |
| <i>Dactylis glomerata</i> L.                                  | x                | <b>x</b> | x        | x        | <b>x</b> | x        | x        |          | <b>x</b> | x                | <b>x</b> | <b>x</b> | x | x |
| <i>Elymus repens</i> (L.) Gould                               | x                | <b>x</b> | x        | x        | x        |          | x        |          |          | x                | x        |          |   | x |
| <i>Lolium pratense</i> (Huds.) Darbysh.                       | <b>x</b>         | x        | <b>x</b> | x        | x        | x        | x        | x        | x        | x                | <b>x</b> | x        | x | x |
| <i>Lolium perenne</i> L.                                      |                  |          | x        | x        |          |          |          | x        | x        | x                |          | x        |   |   |
| <i>Phleum pratense</i> L.                                     | x                | x        | <b>x</b> |          |          |          | x        | <b>x</b> | x        | x                | x        | x        | x | x |
| <i>Poa annua</i> L.                                           |                  |          |          |          |          | x        |          |          |          |                  |          | x        | x | x |
| <i>Poa pratensis</i> L.                                       | x                | <b>x</b> |          | x        | <b>x</b> | x        | <b>x</b> | x        | x        | <b>x</b>         | <b>x</b> |          | x | x |
| <i>Poa trivialis</i> L.                                       | x                | <b>x</b> | x        |          |          |          | x        |          |          |                  |          | x        |   |   |
